# Supplementary material for: The Toxoplasma gondii Cyst Wall Protein CST1 Is Critical for Cyst Wall Integrity and Promotes Bradyzoite Persistence
Source: PubMed Central journal article supplement (PMC3873430; doi:10.1371/journal.ppat.1003823), 2013-12-26

**Figure S1. (A) Schematic of 5' locus for the TGME49\_064660 (cst1) gene.** This figure shows the 5' region of TGME49\_064660 (cst1) locus. The blue region is the 5' UTR that was experimentally determined using 5' RACE. The brown arrows indicate the predicted start site (from [www.toxodb.org](http://www.toxodb.org)), which does not contain the signal sequence, and the putative upstream start site, which includes the predicted signal sequence. The number indicates the number of nucleotides from the end of upstream gene TGME49\_064670.

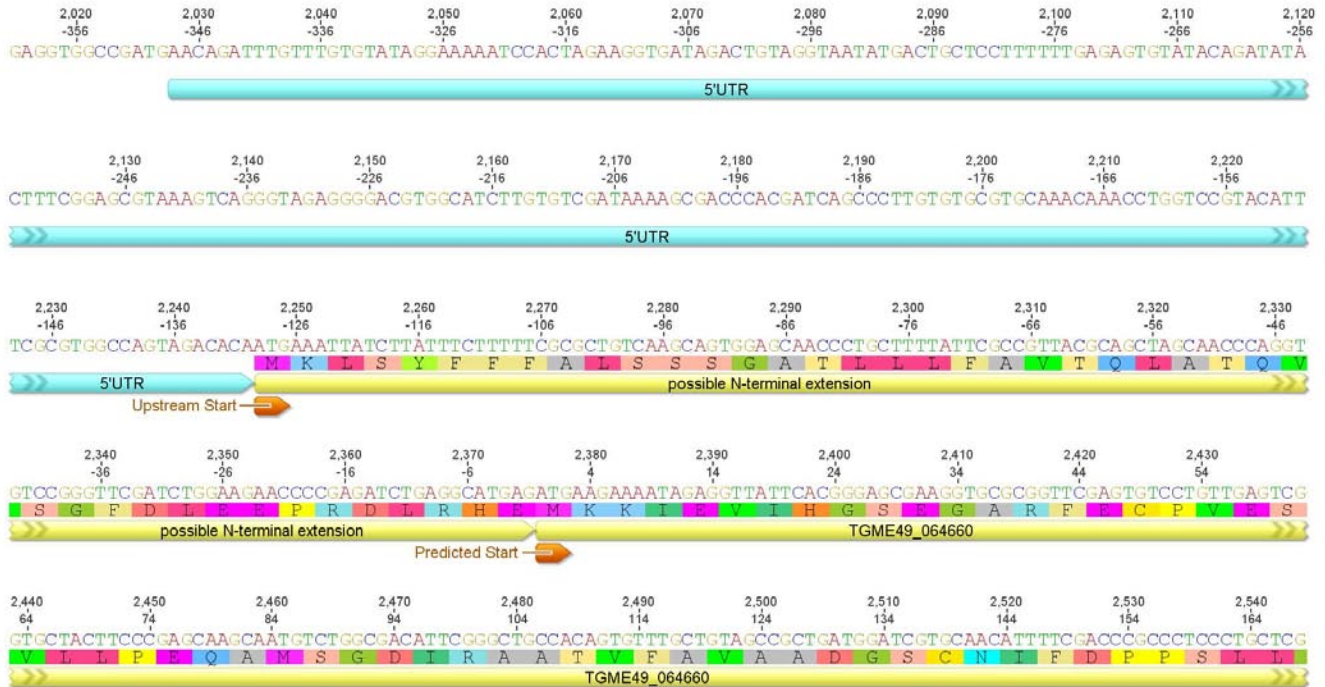

**Figure S1. (B) Presence of CST1 genes in parasites.** PCR was performed (upper panel) with genomic *T. gondii* DNA using primers flanking an intron and the mucin domain in order to show the presence of the genes. The amplicon size expected from each version of *cst1* gene is: gDNA 1824 bp, cDNA 1546 bp, cDNA <sup>$\Delta$ muc</sup> 781 bp. A second PCR was performed (lower panel) with primers upstream of *cst1* and in the center of the selectable marker *HXGPRT* to demonstrate the insertion of the  $\Delta$ *cst1* vector into the *cst1* locus (1321 bp).

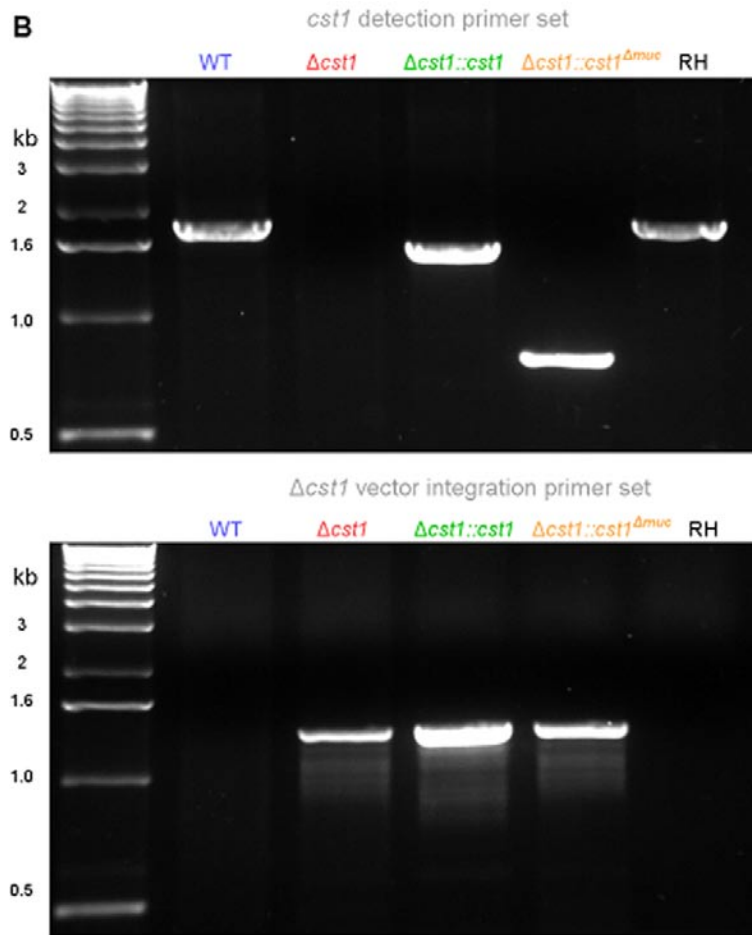

**Figure S1. (C) RNA sequencing data demonstrating the expression of CST1 genes.** Sequence reads of pH shocked parasite RNA mapped to TGME49 genome (ToxoDB) at the *cst1* locus. Type I strain (RH) and Type II (ME49) both express *cst1* mRNA. The *cst* knockout ( $\Delta cst1$ ) does not express CST1, whereas the wild type (WT), cDNA complement ( $\Delta cst1::cst1$ ) and mucin null complement ( $\Delta cst1::cst1^{\Delta muc}$ ) all express CST1.

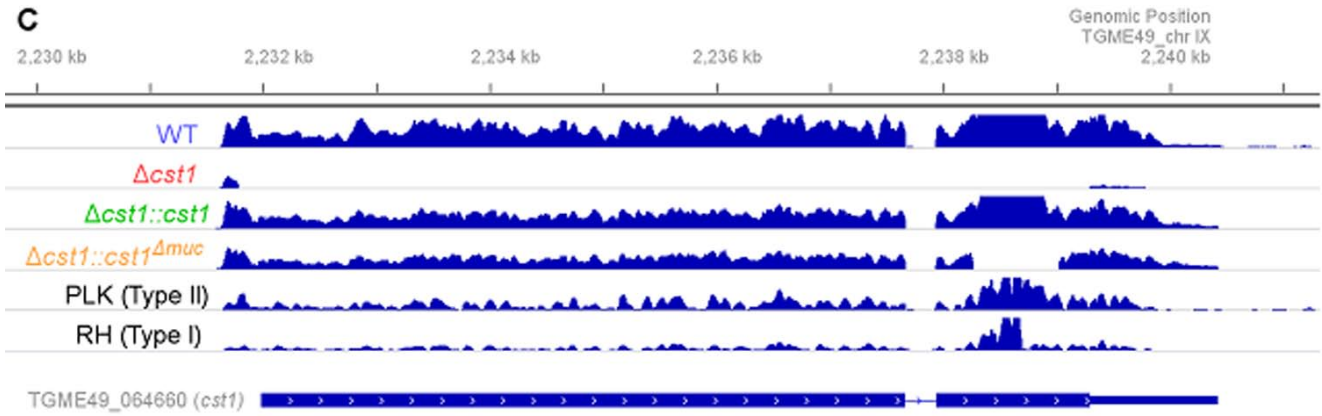

Supplement: ppat.1003823.s001.pdf [file ppat.1003823.s001.pdf]
