# Supplementary material for: The Toxoplasma gondii Cyst Wall Protein CST1 Is Critical for Cyst Wall Integrity and Promotes Bradyzoite Persistence
Source: PubMed Central journal article supplement (PMC3873430; doi:10.1371/journal.ppat.1003823), 2013-12-26
Supplement: ppat.1003823.s002.pdf [file ppat.1003823.s002.pdf]

### FIGURE S2 (B) mAb SalmonE Densitometry

Densitometry measurements for each band and the normalized CST1 expression level (CST/GRA1) for each lane are shown in the following table and figure

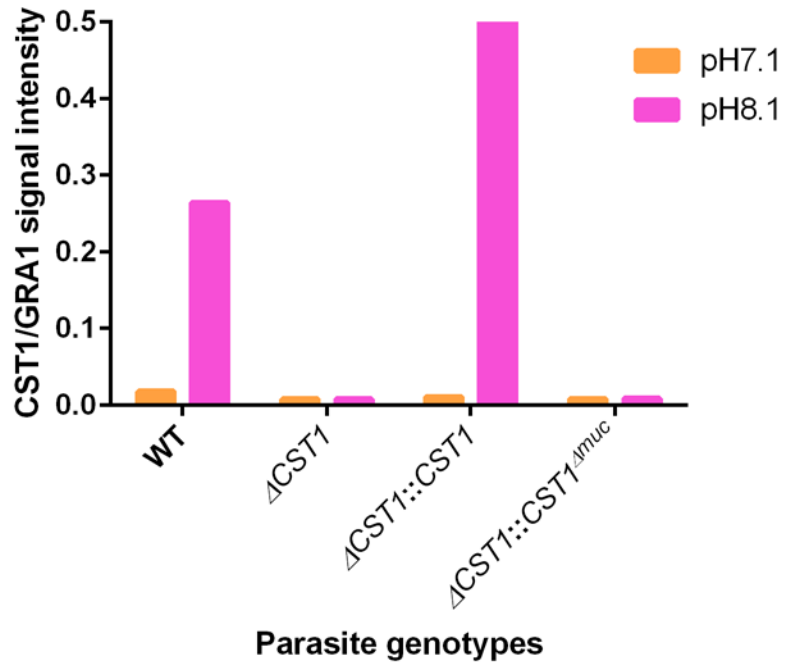

|           | WT pH7  | WT pH8 | $\Delta$ CST1 pH7 | $\Delta$ CST1 pH8 | $\Delta$ CST1::CST1 pH7 | $\Delta$ CST1::CST1 pH8 | $\Delta$ CST1::CST1 $\Delta$ muc pH7 | $\Delta$ CST1::CST1 $\Delta$ muc pH8 |
|-----------|---------|--------|-------------------|-------------------|-------------------------|-------------------------|--------------------------------------|--------------------------------------|
| CST1/GRA1 | 0.018   | 0.264  | 0.008             | 0.008             | 0.011                   | 0.503                   | 0.008                                | 0.009                                |
| CST1      | 21400   | 102000 | 8520              | 2770              | 14100                   | 194000                  | 9110                                 | 2300                                 |
| GRA       | 1180000 | 386000 | 1070000           | 343000            | 1270000                 | 386000                  | 1080000                              | 259000                               |
