# Supplementary material for: The Toxoplasma gondii Cyst Wall Protein CST1 Is Critical for Cyst Wall Integrity and Promotes Bradyzoite Persistence
Source: PubMed Central journal article supplement (PMC3873430; doi:10.1371/journal.ppat.1003823), 2013-12-26

**Figure S3. CST1 $\Delta$ muc protein is expressed and localized to the cyst wall.**

HFF cells were infected with either WT or  $\Delta$ cst1::cst1 <sup>$\Delta$ muc</sup> parasites and probed with anti-CST1 antiserum (red) and DBA (green). This demonstrates that the CST $\Delta$ muc protein is expressed and localized to the cyst wall, that DBA lectin binding is lost in CST1 <sup>$\Delta$ muc</sup> parasites.

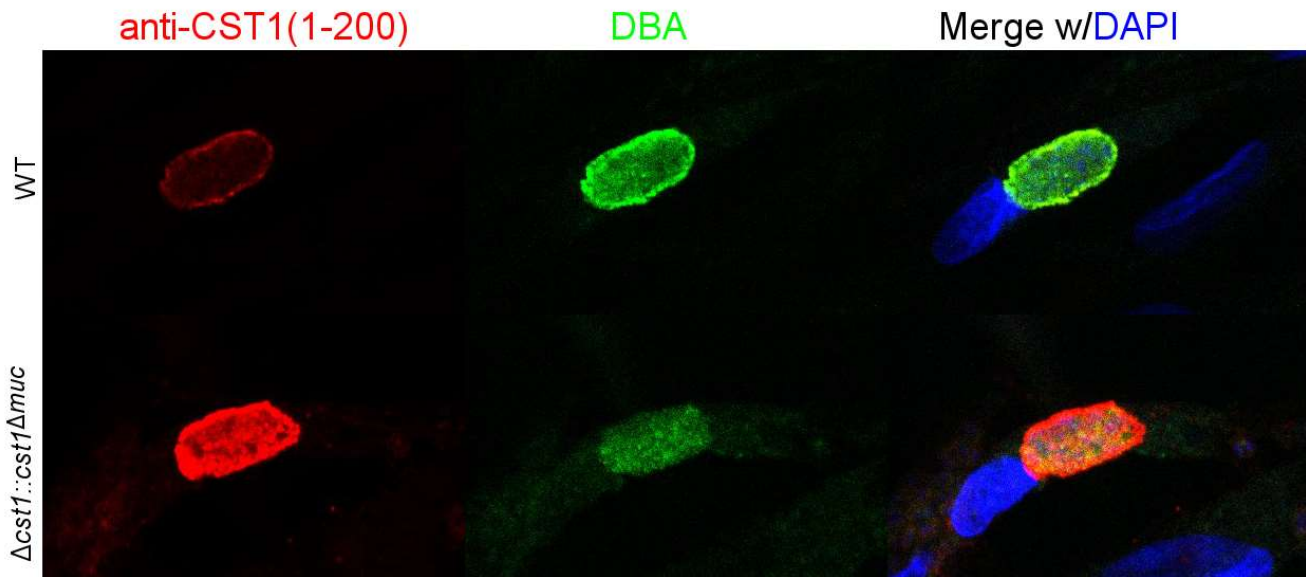

Supplement: ppat.1003823.s003.pdf [file ppat.1003823.s003.pdf]
