# Supplementary material for: The Toxoplasma gondii Cyst Wall Protein CST1 Is Critical for Cyst Wall Integrity and Promotes Bradyzoite Persistence
Source: PubMed Central journal article supplement (PMC3873430; doi:10.1371/journal.ppat.1003823), 2013-12-26

Figure S4. Histology of infected murine brains

Figure S4 (A)

(A) Hematoxylin and eosin (H&E) stained brain sections were scored for meningoencephalomyelitis using a scale of 0 to 5 (n=4).  $p < 0.05$  WT vs  $\Delta cst1::cst1^{\Delta muc}$

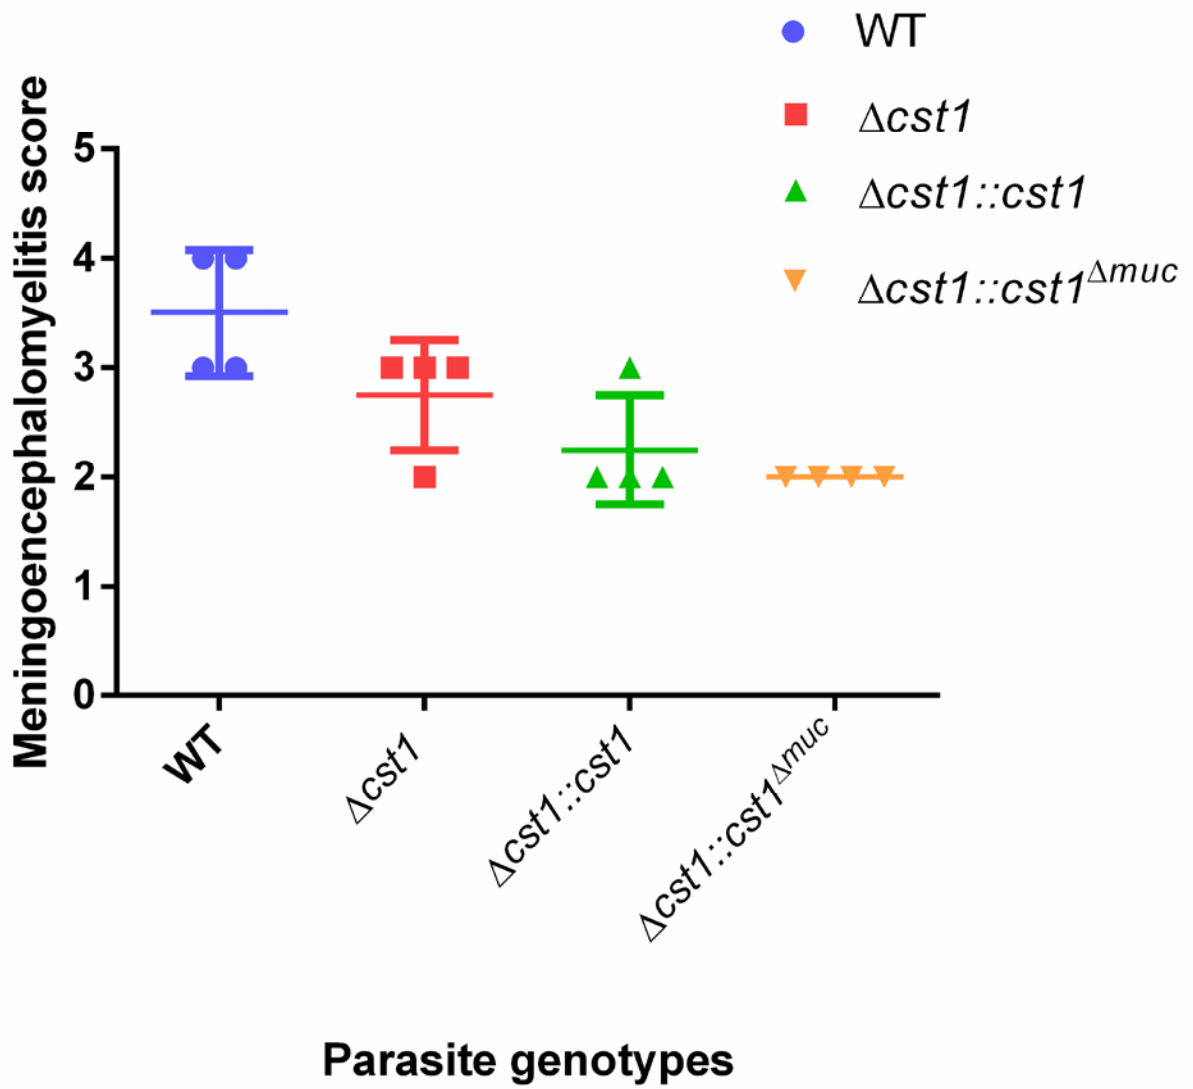

**Figure S4. (B)** Brains from mice infected with WT,  $\Delta cst1$ ,  $\Delta cst1::cst1$ , or  $\Delta cst1::cst1^{\Delta muc}$  parasites for 4 weeks were sectioned and stained with H&E. Photomicrographs were obtained at 4X, 10X and 20X magnifications. Tissue cysts are indicated by a red arrow on 20X magnification images.

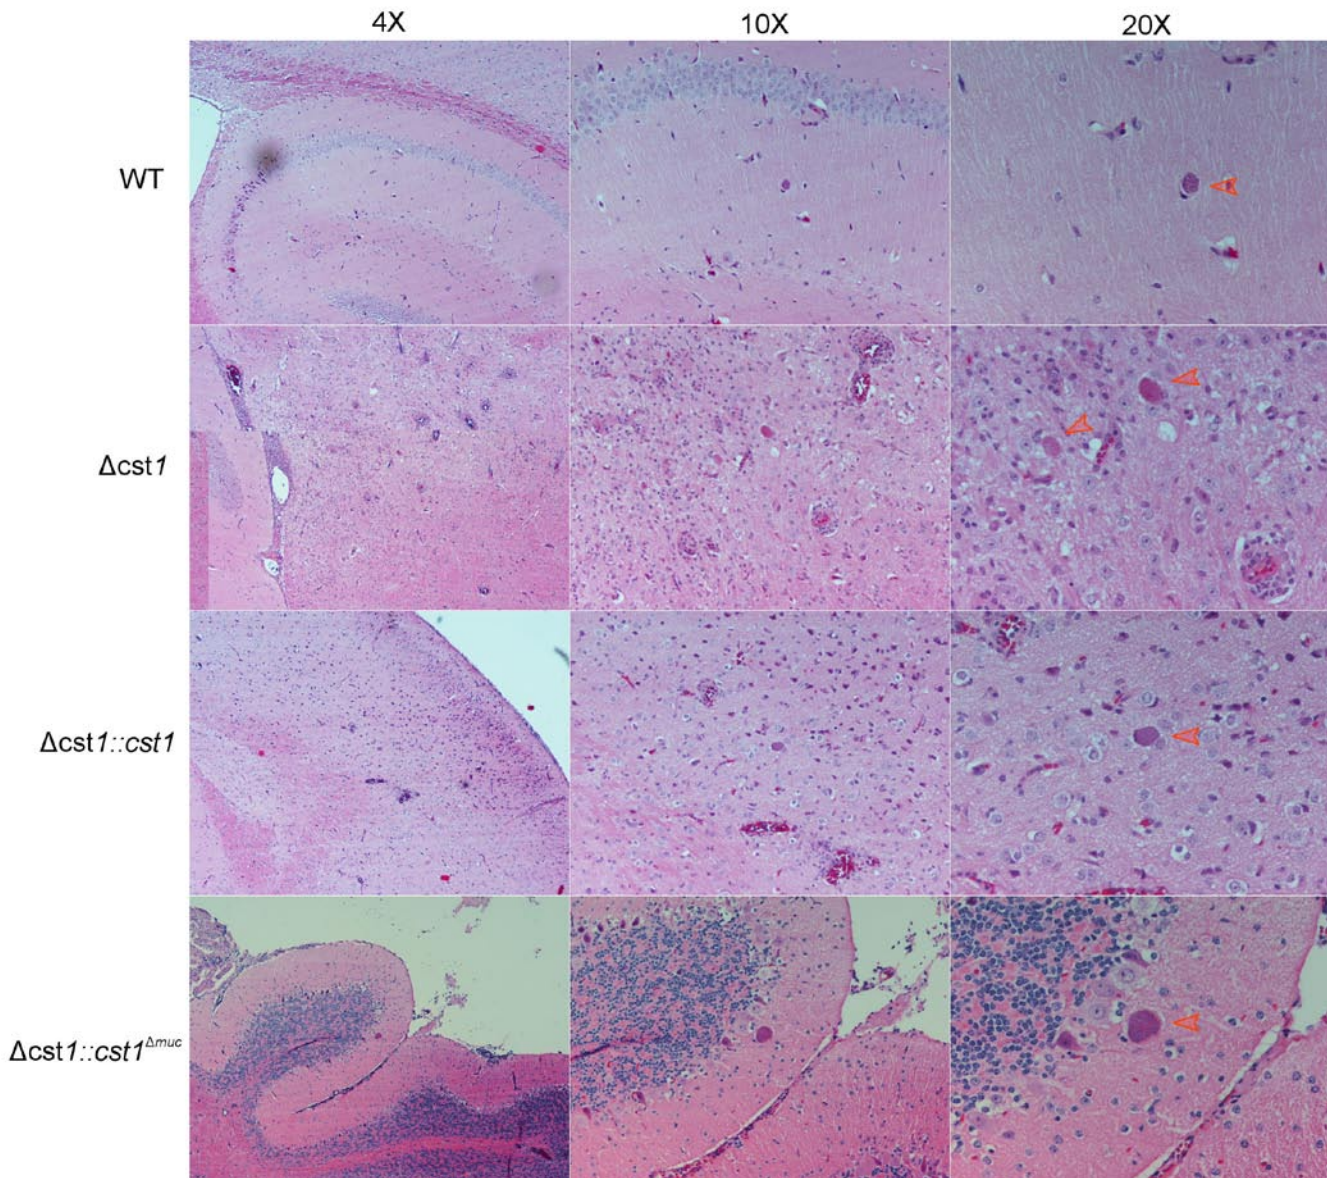

Supplement: ppat.1003823.s004.pdf [file ppat.1003823.s004.pdf]
