# Supplementary material for: The Toxoplasma gondii Cyst Wall Protein CST1 Is Critical for Cyst Wall Integrity and Promotes Bradyzoite Persistence
Source: PubMed Central journal article supplement (PMC3873430; doi:10.1371/journal.ppat.1003823), 2013-12-26

**Figure S5. Parasite growth measured at pH 7.0**

**A. Growth measurement** using  $^3\text{H}$  Uracil. Growth of WT (blue) or  $\Delta\text{cst1}$  parasites (red) in HFF cells (10,000 parasites per well at time zero) at pH 7 was measured as  $^3\text{H}$ -uracil incorporation into parasite DNA. Mean and standard deviation are shown.  $n = 3$ . This experiment was repeated 3 times and had similar results for wells harvested in triplicate.

**B. Growth measurement** by counting parasites. Growth of WT (blue),  $\Delta\text{cst1}$  (red),  $\Delta\text{cst1}::\text{cst1}$  (green),  $\Delta\text{cst1}::\text{cst1}^{\Delta\text{muc}}$  (yellow) parasites at pH7 culture condition was measured by lysing the host HFF cells with 0.5% saponin and counting the free parasites in a hemocytometer.

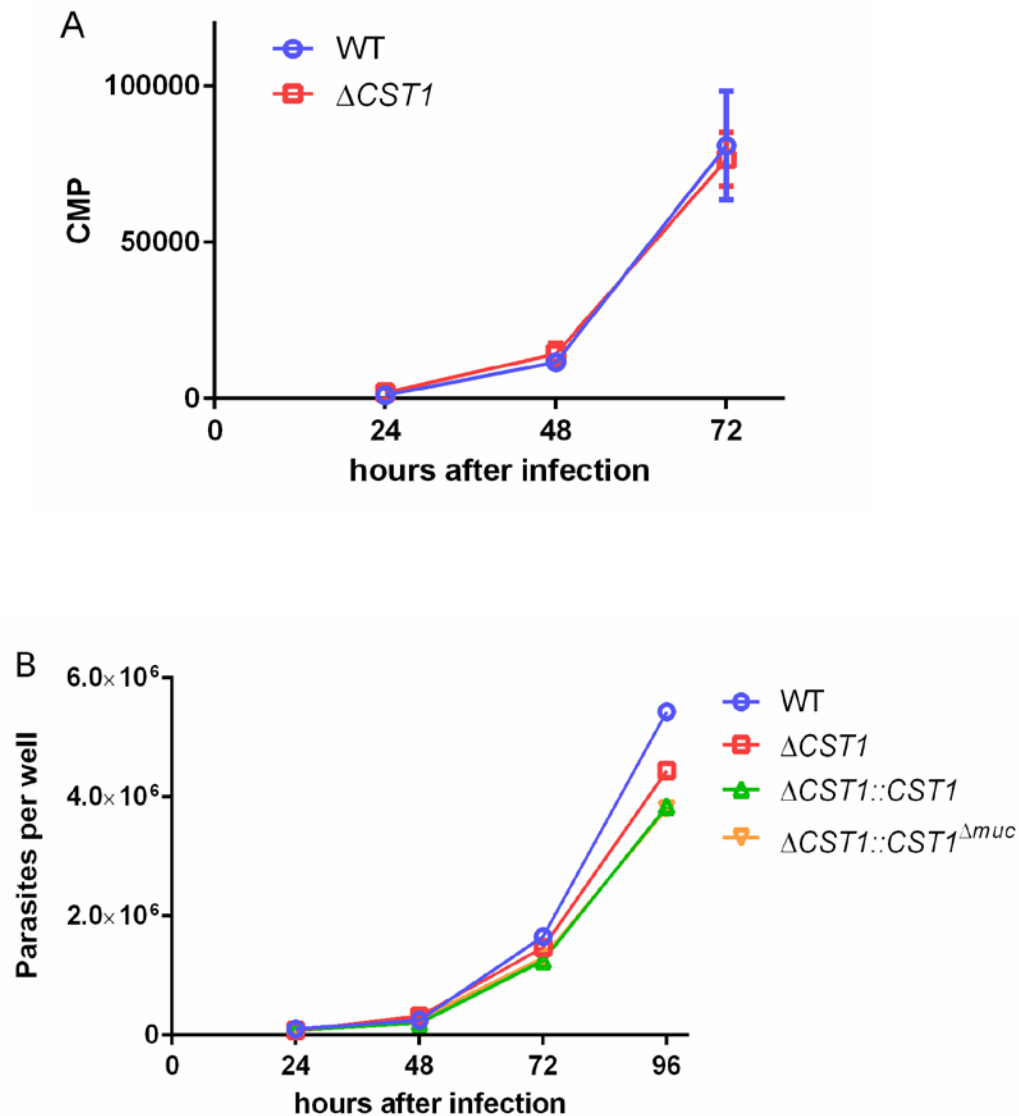

Supplement: ppat.1003823.s005.pdf [file ppat.1003823.s005.pdf]
