# Supplementary material for: The Toxoplasma gondii Cyst Wall Protein CST1 Is Critical for Cyst Wall Integrity and Promotes Bradyzoite Persistence
Source: PubMed Central journal article supplement (PMC3873430; doi:10.1371/journal.ppat.1003823), 2013-12-26

**Figure S6 Immunoblot using SalmonE and 73.18 to R5, ME49 and Pru strains of *T. gondii* and to  $\Delta$ cst1 and  $\Delta$ srs13 strains in KU80Pru *T. gondii*.**

This demonstrates that mAb SalmonE binds to several type II strain *T. gondii* parasites and that a similar sized band is seen in these parasites. This immunoblot also demonstrates that monoclonal 73.18 binds to this high molecular weight band (recognized by mAb SalmonE) as well as a smaller band that we have identified as SRS13 (Weiss unpublished). The  $\Delta$ SRS13 strain still reacts with mABSalmoneE at 250 kDa but lacks the lower molecular weight bands.

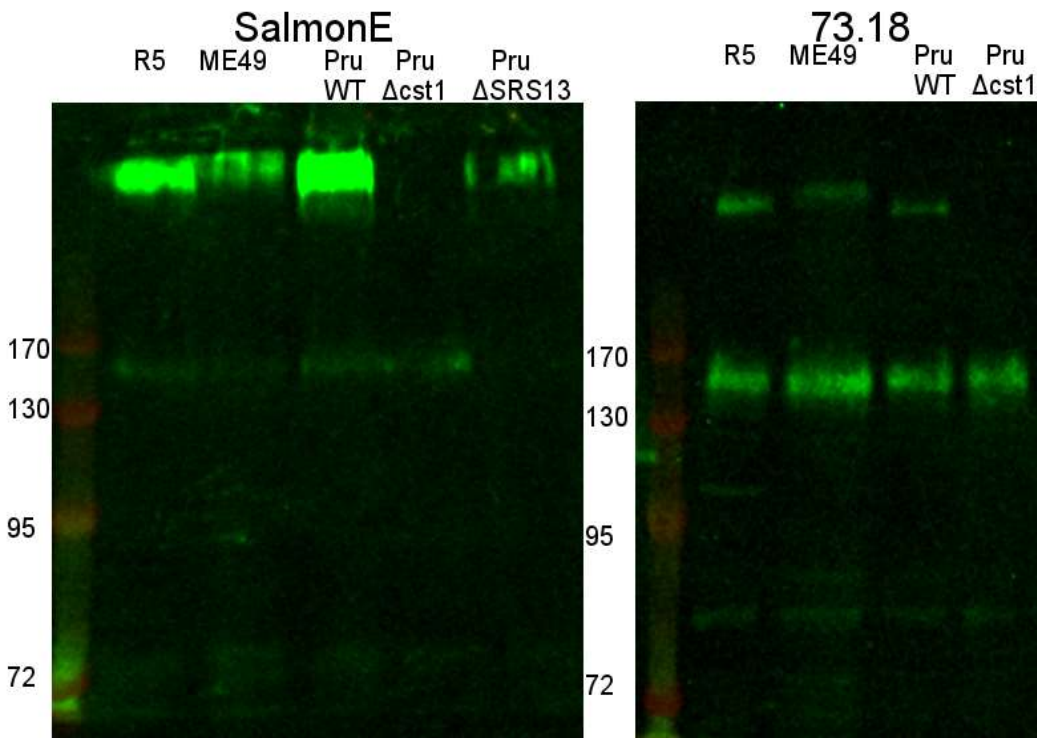

Supplement: ppat.1003823.s006.pdf [file ppat.1003823.s006.pdf]
