# Supplementary material for: The Toxoplasma gondii Cyst Wall Protein CST1 Is Critical for Cyst Wall Integrity and Promotes Bradyzoite Persistence
Source: PubMed Central journal article supplement (PMC3873430; doi:10.1371/journal.ppat.1003823), 2013-12-26
Supplement: ppat.1003823.s007.pdf [file ppat.1003823.s007.pdf]

**Table S1 List of top 50 upregulated genes in bradyzoites.**

Gene up-regulation was determined by the RNA-seq RPKM value at pH 8 divided by that at pH 7. The genes are listed in order of highest upregulation. Gene ID and corresponding descriptions are from ToxoDB.

|    | Gene ID       | Descriptions                                                          |
|----|---------------|-----------------------------------------------------------------------|
| 1  | TGME49_059020 | bradyzoite antigen, putative                                          |
| 2  | TGME49_007210 | hypothetical protein                                                  |
| 3  | TGME49_068860 | enolase 1                                                             |
| 4  | TGME49_009750 | hypothetical protein                                                  |
| 5  | TGME49_009760 | hypothetical protein                                                  |
| 6  | TGME49_007130 | SRS49A (= SAG2Y)                                                      |
| 7  | TGME49_007160 | SRS49D (= SAG2C)                                                      |
| 8  | TGME49_078080 | hypothetical protein                                                  |
| 9  | TGME49_080570 | bradyzoite surface antigen                                            |
| 10 | TGME49_112320 | hypothetical protein                                                  |
| 11 | TGME49_101170 | SRS19D                                                                |
| 12 | TGME49_111370 | methylmalonate-semialdehyde dehydrogenase, putative                   |
| 13 | TGME49_016140 | ankyrin repeat-containing protein                                     |
| 14 | TGME49_021840 | hypothetical protein                                                  |
| 15 | TGME49_072220 | tRNA-Gln                                                              |
| 16 | TGME49_052640 | plasma-membrane H <sup>+</sup> -ATPase, putative                      |
| 17 | TGME49_094070 | tRNA-Gly                                                              |
| 18 | TGME49_071320 | hypothetical protein                                                  |
| 19 | TGME49_106230 | hypothetical protein                                                  |
| 20 | TGME49_114250 | hypothetical protein                                                  |
| 21 | TGME49_002110 | hypothetical protein                                                  |
| 22 | TGME49_097990 | tRNA-Pro                                                              |
| 23 | TGME49_031090 | hypothetical protein                                                  |
| 24 | TGME49_093790 | hypothetical protein                                                  |
| 25 | TGME49_002020 | hypothetical protein                                                  |
| 26 | TGME49_055480 | thioredoxin domain-containing protein                                 |
| 27 | TGME49_120190 | SRS16B (= SRS9)                                                       |
| 28 | TGME49_025290 | nucleoside-triphosphatase, putative                                   |
| 29 | TGME49_058510 | cAMP-specific phosphodiesterase, putative                             |
| 30 | TGME49_007140 | SRS49B (= SAG2X)                                                      |
| 31 | TGME49_059930 | tRNA-Pro                                                              |
| 32 | TGME49_104920 | hypothetical protein, conserved                                       |
| 33 | TGME49_048920 | tRNA-Met                                                              |
| 34 | TGME49_118680 | 3',5'-cyclic-nucleotide phosphodiesterase, putative                   |
| 35 | TGME49_024180 | ankyrin repeat-containing protein                                     |
| 36 | TGME49_073740 | acetyl-CoA acyltransferase B, putative                                |
| 37 | TGME49_040930 | molybdenum cofactor biosynthesis protein c, putative                  |
| 38 | TGME49_035860 | subtilisin-like protease, putative                                    |
| 39 | TGME49_062580 | tRNA-Ile                                                              |
| 40 | TGME49_073940 | hypothetical protein                                                  |
| 41 | TGME49_043470 | hypothetical protein                                                  |
| 42 | TGME49_033880 | tRNA-Ile                                                              |
| 43 | TGME49_062470 | beta antigen, putative                                                |
| 44 | TGME49_032460 | tRNA-Asn                                                              |
| 45 | TGME49_104930 | hypothetical protein                                                  |
| 46 | TGME49_013480 | hypothetical protein                                                  |
| 47 | TGME49_078980 | hypothetical protein, conserved                                       |
| 48 | TGME49_090970 | serine palmitoyltransferase, putative                                 |
| 49 | TGME49_104940 | hypothetical protein, conserved                                       |
| 50 | TGME49_053330 | Rhoptry kinase family protein, truncated (incomplete catalytic triad) |
