# Supplementary material for: The Toxoplasma gondii Cyst Wall Protein CST1 Is Critical for Cyst Wall Integrity and Promotes Bradyzoite Persistence
Source: PubMed Central journal article supplement (PMC3873430; doi:10.1371/journal.ppat.1003823), 2013-12-26
Supplement: ppat.1003823.s008.pdf [file ppat.1003823.s008.pdf]

**Table S2. Primers used for construction of plasmids for the deletion and complementation of *CST1*.**

***Δcst1* plasmid (pRS416)**

TGME49\_064660 5' recombination sequence F/R

TTGGGTAAACGCCAGGGTTTTCCAGTCACGACGGTTTAAACATTATGTTGCTTACCCTATA  
GCGGGTTTGAATGCAAGGTTTCGTGCTGATCAAAGTATCGACACAAGATGCCACGT

HXGPRT cassette F/R

ACTAGTTTGATCAGCACGA  
TAACTAGTCCTCCACCGC

TGME49\_064660 3' recombination sequence F/R

TTCTGGCAGGCTACAGTGACACCGCGGTGGAGGACTAGTTAGAGGCGCCGCGCTACAG  
GTGAGCGGATAACAATTTACACAGGAAACAGCGCGGCCGCACATAAATCTGCAGAGCCTA

**cDNA *CST1* complement plasmid (pSMART-BAC)**

UPRT 5' recombination sequence F/R (1.1kb)

CAACTTGTCCACGTGGAATTGTTAACGTGAGCTCATGCTGGAGCTTCG  
ATGGTACTCTACTTCGTTAAGCTTTCGGCTCGCTGGGAC

*CST1* 5' upstream F/R (1.3kb)

TAAACGAAGTAGAGTACCATCATTACAATTCTGGG  
TCAGATCTCGGGTTCTTCCAGATCGAACCCGGA

*CST1* cDNA F/R (7kb)

AACCCCGAGATCTGAGGCATGAGATGAAGAAAATAGAGGT  
GCGGCGCCTCTACTCATGTCCGCAACAACAACAG

*CST1* 3' UTR (1.1kb)

GAGTAGAGGCGCCGCGCTACAGTTTGTGGAATTTGAT  
AGGGCGAAGTTTTTGAAGACTTAGCTGCACCG

UPRT 3' recombination sequence F/R (1.1kb)

TCTTCAAAAACCTTCGCCCTGCTGTCTTGTGTCAGGTACT  
CAAGTCACGTGAATTGTTAACTGGCGTTCGATCGACCGAAG

**Mucin-null cDNA *CST1* complement plasmid (pSMART-BAC)**

Muc-null *CST1* 5' half R (6kb with *CST1* cDNA F):

CTTATCGTCGTCATCCTTGTAACTTTCATGTTGCAGTGGGTC

Muc-null *CST1* 3' half F (300b with *CST1* cDNA R):

GATTACAAGGATGACGACGATAAGCTCTTCGACTGGAGCAGT

***Δcst1* construct genomic integration PCR primers F/R (1.3kb if integrated)**

ACTGTATAGACGCTGGTTGTA  
CCCGAGAAAAAGAAACGAACAGA

**Primers for the detection of mutant *CST1* (gDNA: 1824 bp, cDNA: 1546 bp, cDNA $\Delta$ *muc*: 781 bp)**

CTTGATAAAACCTGCAAAAGCTGTG  
GTCGATCTTAAAAGGCACCAAAGA
